# Supplementary material for: An ICT-based fluorescence enhancement probe for detection of Sn2+ in cancer cells
Source: Royal Society of Chemistry journal article supplement (doi:10.1039/d0ra07330j), 2020-01-01
Supplement: d0ra07330j1.pdf [file d0ra07330j1.pdf]

*Supporting Information of*

**An ICT-based fluorescence enhancement probe for detection of Sn<sup>2+</sup> in cancer cells**

Xiangying Meng,<sup>a</sup> Lai You,<sup>a</sup> Siyuan Li,<sup>a</sup> Qi Sun,<sup>b</sup> Xiaogang Luo,<sup>b,c</sup> Haifeng He,<sup>a\*</sup> Jinglan Wang,<sup>a\*</sup> Feng Zhao<sup>a\*</sup>

<sup>a</sup>*Jiangxi Engineering Laboratory of Waterborne Coating, School of Chemistry and Chemical Engineering, Jiangxi Science and Technology Normal University, Nanchang 330013, People's Republic of China*

<sup>b</sup>*Key Laboratory for Green Chemical Process of Ministry of Education and School of Chemistry and Environmental Engineering, Wuhan Institute of Technology, Wuhan, 430205, PR China*

<sup>c</sup>*School of Materials Science and Engineering, Zhengzhou University, No.100 Science Avenue, Zhengzhou City 450001, Henan Province, PR China*

\* Corresponding author E-mail: hehf0427@jxstnu.com.cn, [jxnewjl@163.com](mailto:jxnewjl@163.com), [zhf19752003@163.com](mailto:zhf19752003@163.com)

**S1. General information**

Unless stated otherwise, all analytical grad chemicals and solvents used in this paper were purchased from commercial vendors. The salts used in stock solutions of metal ions were Na<sub>2</sub>SO<sub>4</sub>, KNO<sub>3</sub>, AgNO<sub>3</sub>, Pb(NO<sub>3</sub>)<sub>2</sub>, CoSO<sub>4</sub>·7H<sub>2</sub>O, ZnSO<sub>4</sub>·7H<sub>2</sub>O, MgSO<sub>4</sub>, NiSO<sub>4</sub>·6H<sub>2</sub>O, CuSO<sub>4</sub>·5H<sub>2</sub>O, FeSO<sub>4</sub>·7H<sub>2</sub>O, MnSO<sub>4</sub>·2H<sub>2</sub>O, Cr(NO<sub>3</sub>)<sub>3</sub>·9H<sub>2</sub>O, Al(NO<sub>3</sub>)<sub>3</sub>·9H<sub>2</sub>O, Fe(NO<sub>3</sub>)<sub>3</sub>·9H<sub>2</sub>O and Sn(ClO<sub>4</sub>)<sub>2</sub>·3H<sub>2</sub>O. The <sup>1</sup>H and <sup>13</sup>C NMR spectra were collected on a Bruker AV-400(400 MHz) in a DMSO-*d*<sub>6</sub> solution with TMS as the internal standard. Mass spectrometry was recorded with a Finnigan LCQ mass spectrometer and an Agilent 1200 LC/MSD mass spectrometer, and signals were given in m/z. Elemental analysis (EA) was obtained on a Vario ELIII CHNSO elemental analyzer. UV-vis absorption spectra were recorded on a Perkin Elmer Lambda-900 spectrophotometer. Fluorescence spectra was determined by a Hitachi F-4600 fluorescence spectrophotometer. Photoluminescence (PL) quantum yields were carried out using a Hamamatsu system for absolute PL quantum yield measurements (type C11347).

**S2. Calculations**

**S2.1 Determination of Quantum Yield**

The fluorescence quantum yield was deduced by the following equation<sup>1,2</sup>,

$$\Phi_x = \Phi_s \times \frac{D_x}{D_s} \times \frac{A_s}{A_x} \times \frac{\eta_x^2}{\eta_s^2}$$

Here the relative quantum yield of the probe and probe metal complex was determined by using fluorescein as standard fluorescence mean, with quantum yield of  $\Phi_{\text{ref}} = 0.90$  (in NaOH). Where the notations in the above equation such that,  $\Phi$  is the fluorescence quantum yield,  $D$  is the area under the emission spectra at  $\lambda_{\text{em}} = 446$  nm,  $A$  is the absorbance at the excitation wavelength  $\lambda_{\text{ex}} = 350$  nm,  $x$  subscript denotes unknown compound, and  $s$  as standard reference and  $\eta$  is the refractive index of the solvents used.

## S2.2 Determination of Stoichiometry by Continuous Variation Plot (Job's plot) Measurement

The stoichiometric binding ratio of probe **TPPB** and  $\text{Sn}^{2+}$  ion was confirmed by continuous variation emission analysis<sup>3-5</sup> at  $\lambda_{\text{em}} 675$  nm, the resulting data was plotted as change in fluorescence intensity, emission intensity in the vertical axis against the mole fraction,  $X_{\text{Sn}^{2+}}$  of  $\text{Sn}^{2+}$  ions in the horizontal axis.

## S2.3 Determination of Binding Constant

The binding constant of the **TPPB** +  $\text{Sn}^{2+}$  complex formed in solution has been determined by using the standard Benesi-Hildebrand (B-H) equation<sup>3-5</sup>.

$$\frac{1}{F - F_o} = \frac{1}{K_a(F_{\text{max}} - F_o)[\text{Sn}^{2+}]} + \frac{1}{F_{\text{max}} - F_o}$$

Where,  $F_o$  is the fluorescence intensity of free probe **TPPB**,  $F$  is the observed fluorescence intensity at any given concentration of  $\text{Sn}^{2+}$ ,  $F_{\text{max}}$  is the intensity at saturation point with the  $\text{Sn}^{2+}$ ,  $K_a$  is the association constant and  $[\text{Sn}^{2+}]$  is the concentration of the  $\text{Sn}^{2+}$  ions in micromolar.

## S2.4 Determination of Detection Limit

The detection limit was calculated based on fluorescence titration as a function the solubility of  $\text{Sn}^{2+}$  at  $\lambda_{\text{em}} 446$  nm. The fluorescence emission spectrum of free probe **TPPB** was measured over 3 times to determine standard deviation for blank measurement. A linear plot was constructed with average values of the intensities against the concentration of  $\text{Sn}^{2+}$  ions for determining the slope. Using the slope the detection limit was calculated from the following equation<sup>3, 5, 6</sup>.

$$LOD = \frac{3\sigma}{K}$$

where,  $\sigma$  is the standard deviation of the blank solution and  $K$  is the slope between intensity versus sample concentration.

### S3. Cell Cultures and Imaging

Hela Cells were cultured in Dulbecco's modified Eagle's medium (DMEM) supplemented with 10% fetal bovine serum and penicillin-streptomycin ( $0.5 \text{ U} \cdot \text{mL}^{-1}$  of penicillin and  $0.5 \text{ g} \cdot \text{mL}^{-1}$  streptomycin) on a cell culture flask at  $37^\circ\text{C}$  in an atmosphere of air with 5%  $\text{CO}_2$  and constant humidity. Each cell line was seeded in a 6-well plate for 24 h. The cells were initially incubated with **TPPB** ( $20 \mu\text{M}$ ) in culture medium for 30 min at  $37^\circ\text{C}$ . After washing three times with PBS to remove the remaining **TPPB**, the Hela cells were incubated in the absence and presence of  $\text{Sn}^{2+}$  ( $200 \mu\text{M}$ ) in culture medium for another 30 min at  $37^\circ\text{C}$ . The imaging was carried out using inverted fluorescence microscopy (Olympus IX71, Japan).

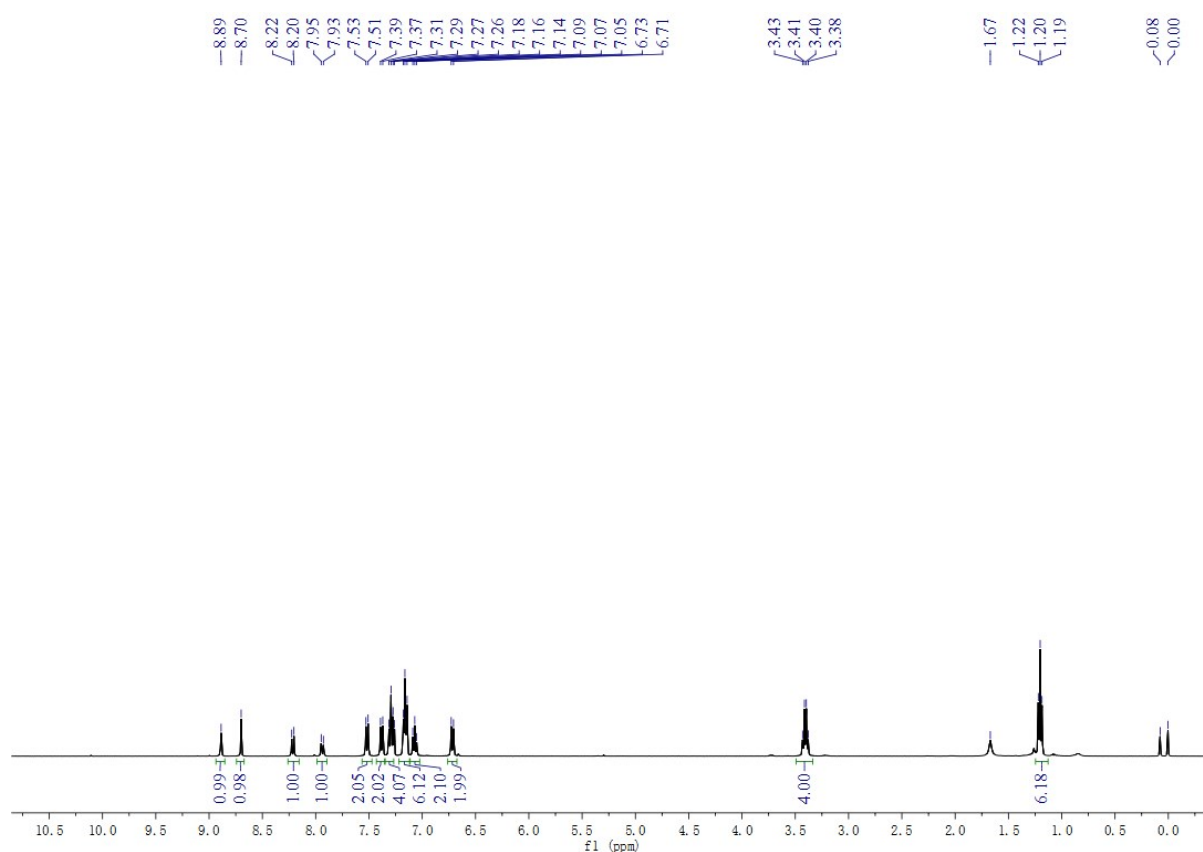

**Fig. S1.**  $^1\text{H}$  NMR Spectrum of probe **TPPB** in  $\text{CDCl}_3$

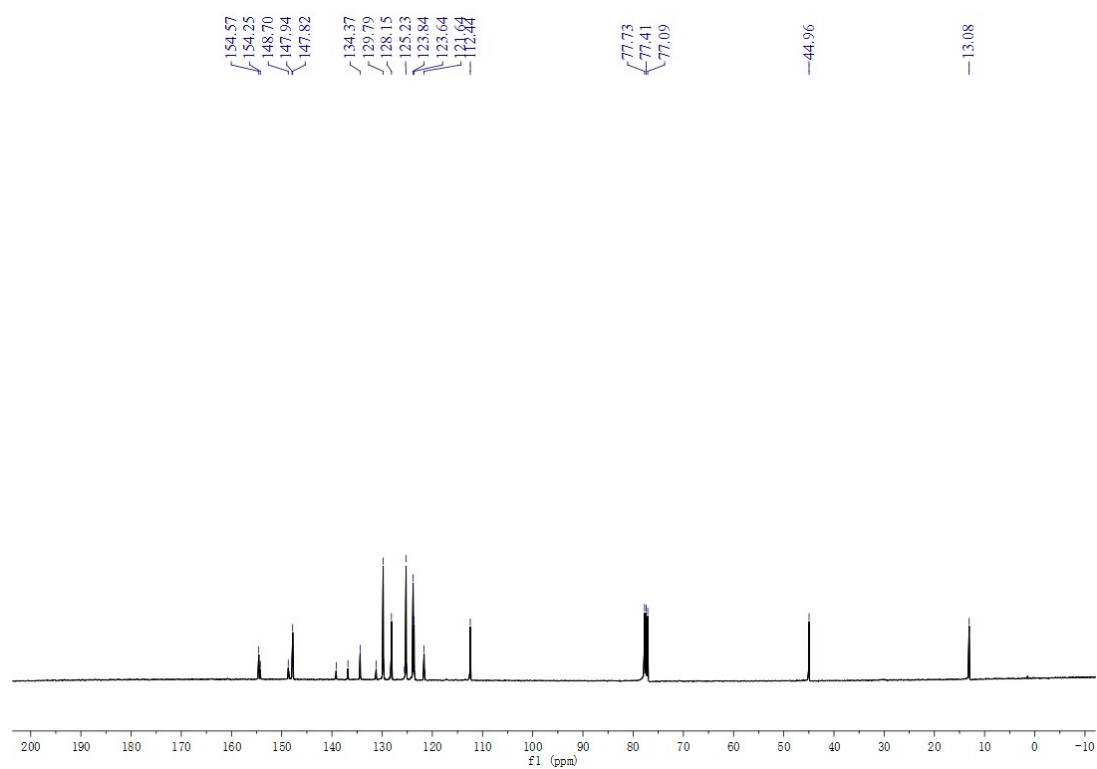

**Fig. S2.** <sup>13</sup>C NMR Spectrum of probe TPPB in CDCl<sub>3</sub>

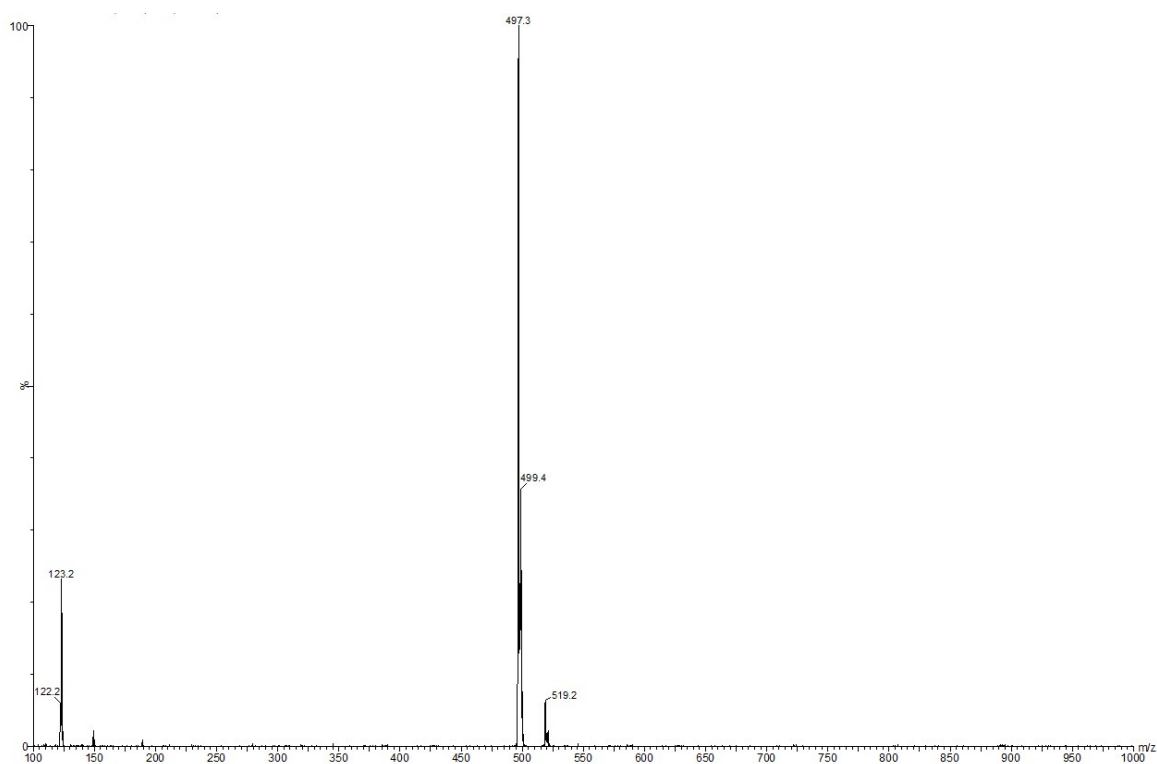

**Fig. S3.** MS Spectrum of probe TPPB

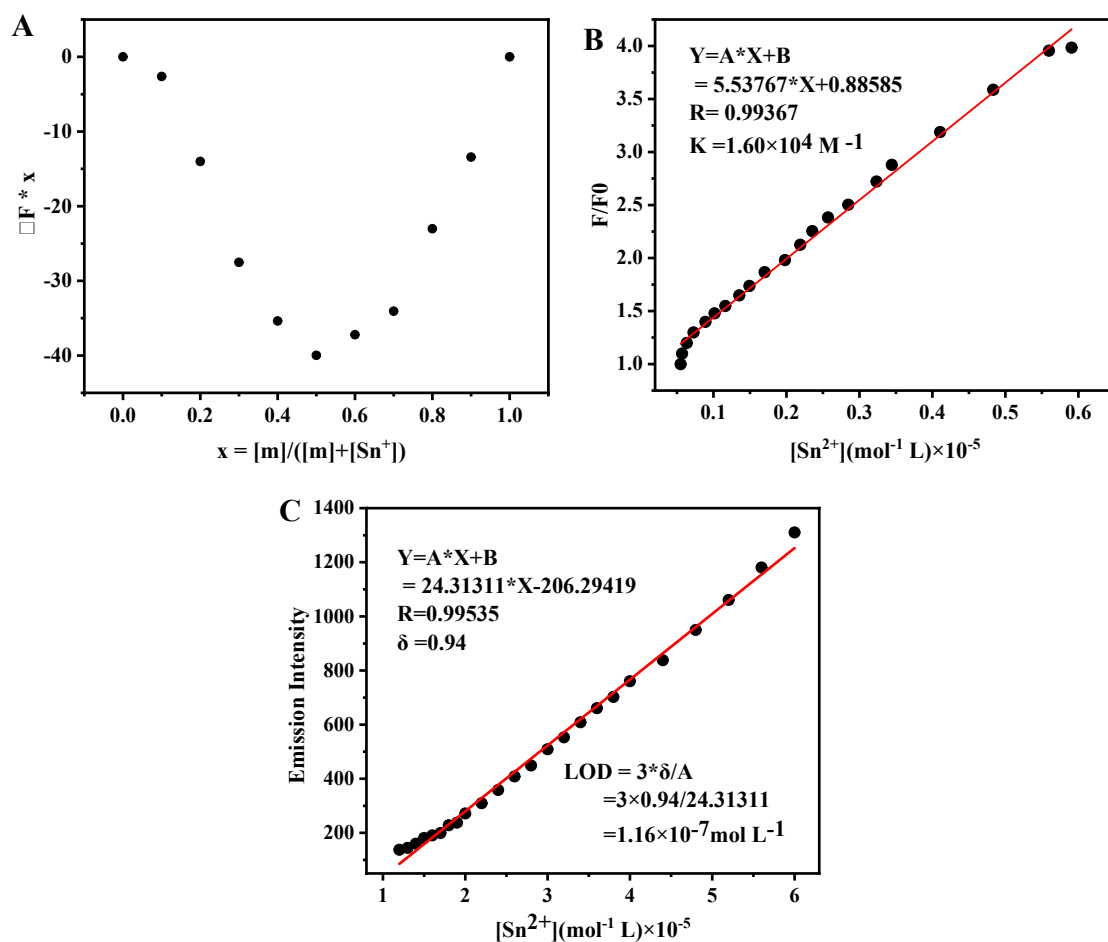

**Fig. S4** (A) Job's plot for the complex of **TPPB** with  $\text{Sn}^{2+}$  in THF; (B) The association constant ( $K_a$ ) is  $1.6 \times 10^4 \text{ M}^{-1}$ ; (C) The limit of detection (LOD) is  $0.116 \mu\text{M}$ .

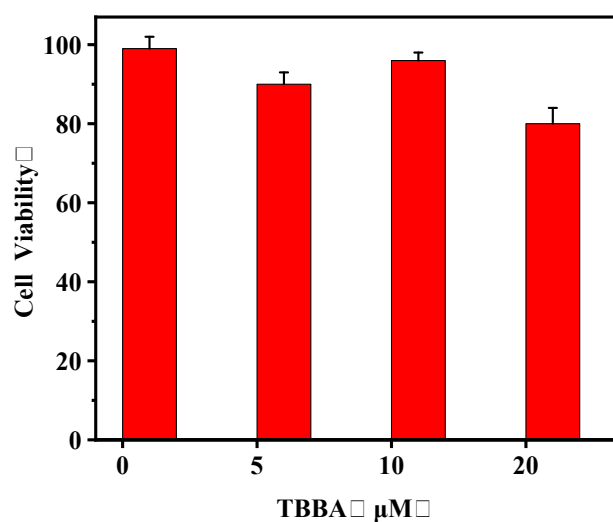

**Fig. S5.** The cytotoxicity of **TPPB** against normal cells incubated with different concentration of **TPPB** for 24 h

## References

1. S.-J. Li, Y.-J. Fu, C.-Y. Li, Y.-F. Li, L.-H. Yi and J. Ou-Yang, *Anal. Chim. Acta*, 2017, **994**, 73-81.
2. E. Bozkurt, M. Arik, Y. Onganer, *Sensor Actuat B-Chem*, 2015, **221**, 136-147.
3. Y. Li, J. Wu, X. Jin, J. Wang, S. Han, W. Wu, J. Xu, W. Liu, X. Yao and Y. Tang, *Dalton Trans.*, 2014, **43**, 1881-1887.
4. T. Ackermann, *Berichte der Bunsengesellschaft für physikalische Chemie*, 1987, **91**, 1398-1398.
5. M. Ahumada, E. Lissi, A. M. Montagut, F. Valenzuela-Henríquez, N. L. Pacioni and E. I. Alarcon, *Analyst*, 2017, **142**, 2067-2089.
6. M. Shortreed, R. Kopelman, M. Kuhn and B. Hoyland, *Anal. Chem.*, 1996, **68**, 1414-1418.
